# Supplementary material for: Synthesis of aza-BODIPYs with barrier-free rotation of the –tBu group at 3-site and enhancement of photothermal therapy by triggering cancer cell apoptosis
Source: Royal Society of Chemistry journal article supplement (doi:10.1039/d2tb01513g), 2022-01-01
Supplement: d2tb01513g1.pdf [file d2tb01513g1.pdf]

## Supporting Information For

### Synthesis of aza-BODIPYs with barrier-free rotor of the *-t*Bu group at 3-site and enhancement of photothermal therapy by triggering cancer cells apoptosis

Junzhu Zhao,<sup>a†</sup> Huan Wang,<sup>b†</sup> Dongxiang Zhang,<sup>a†</sup> Yue Shen,<sup>a</sup> Shan Zhang,<sup>b</sup> Junyi Ren,<sup>b</sup> Zhan Wang,<sup>b</sup> Ya-nan Sun,<sup>a</sup> Jianjun Du,<sup>\*c</sup> Xin-Dong Jiang,<sup>\*a</sup> and Guiling Wang<sup>\*b</sup>

- a. Liaoning & Shenyang Key Laboratory of Functional Dye and Pigment, Shenyang University of Chemical Technology, Shenyang, China. E-mail: [xdjiang@syuct.edu.cn](mailto:xdjiang@syuct.edu.cn)
- b. Department of Cell Biology, China Medical University, Shenyang, 110122, China. E-mail: [glingwang@cmu.edu.cn](mailto:glingwang@cmu.edu.cn)
- c. State Key Laboratory of Fine Chemicals, Dalian University of Technology, Dalian, China. E-mail: [dujj@dlut.edu.cn](mailto:dujj@dlut.edu.cn)

|                                                    |     |
|----------------------------------------------------|-----|
| <b>1. Experimental section</b> .....               | S2  |
| <b>2. Table and Figure</b> .....                   | S8  |
| <b>3. NMR</b> .....                                | S11 |
| <b>4. HRMS</b> .....                               | S13 |
| <b>5. X-ray data for <i>t</i>Bu-azaBDP 1</b> ..... | S14 |
| <b>6. References</b> .....                         | S26 |

## 1. Experimental section

### 1.1 General

All solvents and chemical reagents were analytical grade in this article, purchased from Energy Chemical & Technology (Shanghai) Co. Ltd and used without further purification unless specifically stated.  $^1\text{H}$  NMR spectra were measured on a VARIAN Mercury 500 MHz spectrometer.  $^{13}\text{C}$  NMR spectra were recorded on a VARIAN Mercury 125 MHz spectrometer.  $\text{CDCl}_3$  was used as a solvent.  $^1\text{H}$  NMR chemical shifts ( $\delta$ ) are given in ppm downfield from  $\text{Me}_4\text{Si}$ , determined by residual  $\text{CDCl}_3$  ( $\delta = 7.26$  ppm). For  $^{13}\text{C}$  NMR chemical shifts ( $\delta$ ), all signals are reported with the internal chloroform signal at ( $\delta = 77.0$  ppm) as standard in ppm. UV/Vis spectra were recorded on a UV-2550 spectrophotometer at room temperature. Fluorescence spectra were recorded on F-98 spectrophotometer. A 690 nm laser were applied as the light source for light irradiation, controlling by a fiber coupled laser system for the laser output power and purchased from Changchun New Industries Optoelectronics Technology. Optical power density was measured by a CEL-NP 2000 power meter, purchased from Beijing Zhong Jiao Jin Yuan Technology Co., Ltd. Laser particle size analyzer purchased from Malvern. Confocal laser fluorescence microscope FV1200 (Olympus, Japan) was applied to estimate fluorescence imaging.

### 1.2 Synthesis of azaBDP 1

Under air, sodium nitrite (6.9 mg, 0.1 mmol) was added to 2-(*tert*-butyl)-4-phenyl-1*H*-pyrrole<sup>1</sup> (19.9 mg, 0.1 mmol) in acetic acid (0.5 mL) at 0 °C, stirring vigorously for 10 min. Then, 7-methoxy-3-phenyl-4,5-dihydro-1*H*-benzo[*g*]indole<sup>2</sup> (27.5 mg, 0.1 mmol) was added, followed by acetic anhydride (0.2 mL). After stirring for 15 min at room temperature, the mixture was allowed to be heated to 80 °C for 2 h. Crushed ice was added to the mixture, and the organic dye was washed with brine for 3 times. The organic dye was dissolved in  $\text{CH}_2\text{Cl}_2$ , filtered through a pad of alumina (activity III). Using a rotary evaporator to remove the organic solvent, this residue was dissolved into dry 1,2-dichloroethane. Then, triethylamine (0.3 mL) was added, followed by  $\text{BF}_3 \cdot \text{Et}_2\text{O}$  (0.5 mL) with stirring for 0.5 h at room temperature, then heated to 80 °C

with stirring for 4 h. The reaction was quenched with crushed ice, extracted with  $\text{CH}_2\text{Cl}_2$  ( $3 \times 80$  mL) and dried over anhydrous  $\text{Na}_2\text{SO}_4$ . After solvent removal by evaporation, the resulting crude product was purified by column chromatography ( $\text{CH}_2\text{Cl}_2/n$ -hexane = 1:1) to afford dye **1** as green solids (22.4 mg, 0.042 mmol, 42%).  $^1\text{H}$  NMR (400 MHz,  $\text{CDCl}_3$ ):  $\delta$  (ppm) 8.72 (d,  $^3J = 8.8$  Hz, 1H), 8.01 (d,  $^3J = 8.0$  Hz, 2H), 7.71 (d,  $^3J = 8.0$  Hz, 2H), 7.48 (t,  $^3J = 8.0$  Hz, 2H), 7.42 (t,  $^3J = 8.0$  Hz, 1H), 7.36 (t,  $^3J = 8.0$  Hz, 2H), 7.33 (t,  $^3J = 8.0$  Hz, 1H), 7.02 (dd,  $^3J = 8.8$  Hz,  $^4J = 2.8$  Hz, 1H), 6.85 (d,  $^4J = 2.8$  Hz, 1H), 6.74 (s, 1H), 3.91 (s, 3H), 2.95 (s, 4H), 1.57 (s, 9H).  $^{13}\text{C}$  NMR (125 MHz,  $\text{CDCl}_3$ ):  $\delta$  (ppm) 168.0, 162.9, 155.7, 146.3, 145.2, 144.1, 140.4, 138.5, 133.3, 132.7, 132.3, 131.9, 130.5, 129.1, 128.7, 128.5, 128.4, 128.3, 119.9, 114.9, 114.6, 113.3. HRMS-MALDI ( $m/z$ ):  $[\text{M}+\text{Na}]^+$  calcd for  $\text{C}_{33}\text{H}_{30}\text{BF}_2\text{N}_3\text{ONa}^+$ : 556.23422, found 556.23401.

### 1.3 Synthesis of azaBDP **2**

2-(*Tert*-butyl)-4-phenyl-*1H*-pyrrole (19.9 mg, 0.1 mmol) was employed as the first pyrrole moiety, and 2-(4-methoxyphenyl)-4-phenyl-*1H*-pyrrole<sup>2</sup> as the second pyrrole moiety (24.9 mg, 0.1 mmol) was used. Dye **2** as blue solids was obtained (21.8 mg, 0.043 mmol, 43%).  $^1\text{H}$  NMR (400 MHz,  $\text{CDCl}_3$ ):  $\delta$  (ppm) 8.09 (d,  $^3J = 8.8$  Hz, 2H), 8.04 (d,  $^3J = 7.2$  Hz, 2H), 7.99 (d,  $^3J = 7.2$  Hz, 2H), 7.38-7.46 (m, 6H), 7.04 (d,  $^3J = 8.8$  Hz, 2H), 7.03 (s, 1H), 6.80 (s, 1H), 3.91 (s, 3H), 1.54 (s, 9H).  $^{13}\text{C}$  NMR (125 MHz,  $\text{CDCl}_3$ ):  $\delta$  (ppm) 162.2, 147.2, 143.8, 132.9, 132.4, 131.9, 131.8, 129.6, 129.5, 129.4, 129.2, 128.7, 128.6, 124.6, 124.5, 124.1, 119.3, 119.1, 116.6, 114.3, 55.6, 35.4, 30.3. HRMS (ESI)  $m/z$  calcd for  $\text{C}_{31}\text{H}_{28}\text{BF}_2\text{N}_3\text{ONa}^+$  ( $\text{M}+\text{Na}$ )<sup>+</sup> 530.21857, found 530.21783.

### 1.4 Absorption and fluorescence spectra

After accurately weighing a certain mass of dyes, the stock solutions of **azaBDPs 1-3** were dissolved in DMSO for concentrations of 10 mM and reserved in are frigerator for use. The testing concentrations were 10  $\mu\text{M}$  in dichloromethane solution at room temperature. Absorption and fluorescence spectra were recorded in a

3 mL cuvette. Absorbance and fluorescence data were normalized. Three excitation wavelengths were maxima absorbance of **azaBDPs 1-3**, respectively (slit: 5 nm/5 nm).

### 1.5 Evaluation of singlet oxygen generation capacity

1,3-diphenylisobenzofuran (DPBF) was employed as an indicator of singlet oxygen production. These mixed solutions were excited at the maximum absorption wavelength of the dyes, and the excitation intensity was regulated to  $0.5 \text{ mW}\cdot\text{cm}^{-2}$  controlled by the optical power densitometer. Absorption spectra were investigated within 0-12 min at intervals of 2 min. The linear slope of the absorbance of log value of DPBF in 416 nm with light radiation time can be applied to evaluate the singlet oxygen production effect. Afterwards, with the reference of 2,6-diiodobodipy ( $^1\text{O}_2$  production efficiency is 85% in toluene solution), the  $^1\text{O}_2$  production efficiency can be calculated by the reported formula.<sup>3-5</sup>

$$\Phi_{sam} = \Phi_{std} \left( \frac{m_{sam}}{m_{std}} \right) \left( \frac{F_{std}}{F_{sam}} \right)$$

Where “*sam*” represents the unknown dye molecule and “*std*” represents the reference 2,6-diiodobodipy. “*m*” is the slope of DPBF absorption peak decline, “*F*” is the absorption correction factor,  $F = 1 - 10^{-\text{O.D.}}$ . O.D. represents the absorption value of the sample at the wavelength of light radiation.

### 1.6 Preparation and characterization of dye nanoparticles

The dyes and amphiphilic polymer DSPE-PEG<sub>2000</sub> were self-assembled in ultrapure water by nano-deposition method.<sup>6-7</sup> The accurately weighing 1mg dye was fully dissolved in 1ml THF solution. Then, the above solution was dropwise added to 10 mL aqueous solution containing 5 mg DSPE-PEG<sub>2000</sub>. THF was completely volatilized after 24 h vigorous agitation. The dye nanoparticles were obtained by high-speed centrifugation for 1 h. The aqueous solution of nanoparticles used in subsequent testing was prepared by precisely weighing a certain nanoparticles and

dissolved in ultrapure water. The average hydrodynamic diameter and polymer dispersity index (PDI) were obtained by dynamic light scattering (DLS) analysis.

### 1.7 Photothermal effect and photothermal conversion efficiency

The temperatures elevated of dye nanoparticles (20, 40, 80  $\mu\text{M}$ ) with different concentrations were investigated under the power density radiation (690 nm, 0.6  $\text{W}\cdot\text{cm}^2$ ). And, the temperatures elevated of dye nanoparticles (80  $\mu\text{M}$ ) were investigated under 690 nm light radiation (0.2, 0.4, 0.6  $\text{W}\cdot\text{cm}^2$ ). The temperatures were recorded in a temperature monitoring camera. The heating stage was light radiation for 5 min, in which the temperature change was recorded every 0.5 min, and the natural cooling was performed after the light source was removed. The 5 cycles of heating-cooling were used to evaluate the photothermal stability.

The calculation of photothermal conversion efficiency was based on the previously reported studies, and the calculation method was described by the following formula<sup>8-10</sup>.

$$\eta = \frac{hs(T_{Max} - T_{Surr}) - Q_{Dis}}{I(1 - 10^{-A})}$$

Among them,  $\eta$  represents photothermal conversion efficiency,  $h$  is the heat transfer coefficient,  $s$  is the surface area of the container,  $Q_{Dis}$  represents heat dissipated from the laser mediated by the solvent and container.  $I$  is the laser power and  $A$  is the absorbance at 690 nm.

$$hs = \frac{mC}{\tau_s}$$

$m$  is the mass of the solution containing the PTAs,  $C$  is the specific heat capacity of the solution, and  $\tau_s$  is the associated time constant.

$$t = -\tau_s \ln \frac{\theta}{\theta_0}$$

$q$  is a dimensionless parameter, known as the driving force temperature.

$$\theta = \frac{T - T_{Surr}}{T_{Max} - T_{Surr}}$$

$T$  is the current temperature.  $T_{Max}$  and  $T_{Surr}$  represent the maximum steady state

temperature and the environmental temperature, respectively.

### **1.8 Live-dead cell imaging experiment**

Gastric cancer cells SGC-7901 were incubated in confocal imaging dish for different treated groups. Control Group: no processing; Light Group: sole NIR laser radiation ( $0.2 \text{ W}\cdot\text{cm}^2$ , 20 min) treated; 1-NPs Group: sole  $30 \mu\text{M}$  1-NPs incubation; “1-NPs+ light” Group: NIR laser radiation ( $0.2 \text{ W}\cdot\text{cm}^2$ , 20 min) was conducted after  $30 \mu\text{M}$  1-NPs incubation. Meanwhile, calcein AM and propidium iodide PI double-staining kits were applied to image living cells (green fluorescence emission) and dead cells (red fluorescence emission), respectively. Calcein AM was excited with a 488 nm laser, detected in the range from 500 to 529 nm; propidium iodide PI was excited with a 559 nm laser, detected in the range from 570 to 619 nm by a confocal laser scanning microscopy.

## 2. Table and Figure

**Table S1** Photophysical properties of dyes **1-3** in CH<sub>2</sub>Cl<sub>2</sub> at 298 K.

| Dye      | $\lambda_{\text{abs}}/\lambda_{\text{em}}$ (nm) | Stokes-shift (nm) | $\epsilon$ [M <sup>-1</sup> cm <sup>-1</sup> ] | $\Phi_f$ |
|----------|-------------------------------------------------|-------------------|------------------------------------------------|----------|
| <b>1</b> | 662/677                                         | 15                | 95000                                          | 0.13     |
| <b>2</b> | 636/665                                         | 29                | 75000                                          | 0.15     |
| <b>3</b> | 690/716                                         | 26                | 108000                                         | 0.44     |

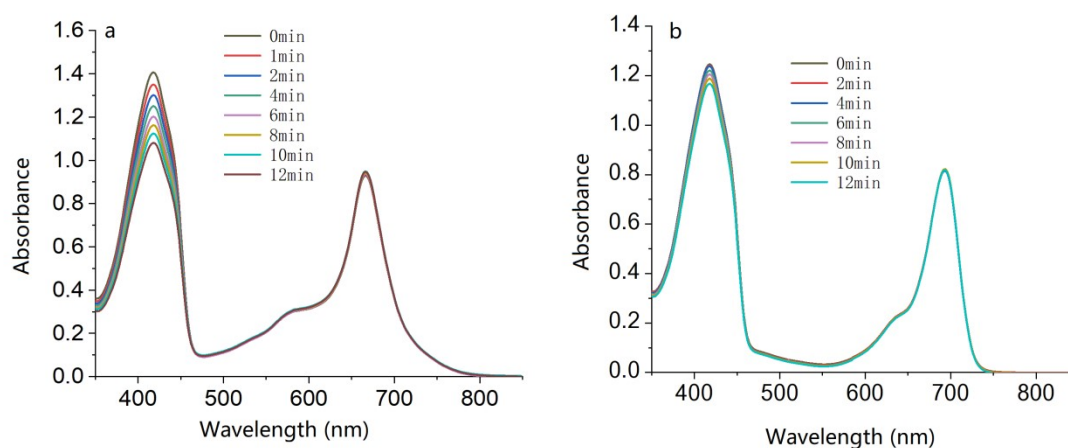

**Fig. S1** Time-dependent photo-degradation of DPBF with a) ***t*Bu-azaBDP 2** and b) **Ph-azaBDP 3**.

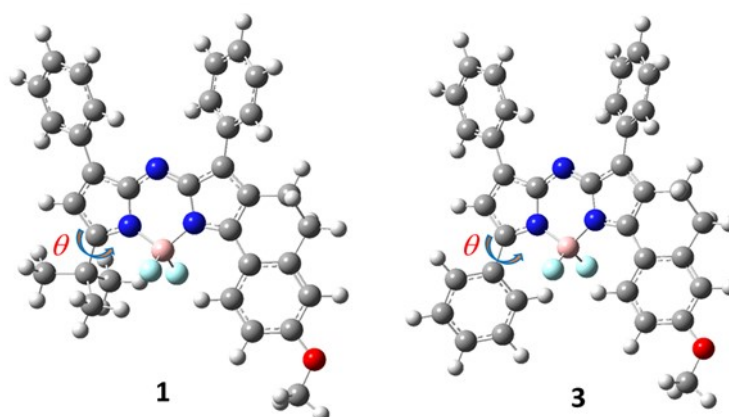

**Fig. S2** Dihedral angles  $\theta$  for the chemical bond of ***t*Bu-azaBDP 1** and **Ph-azaBDP 3**.

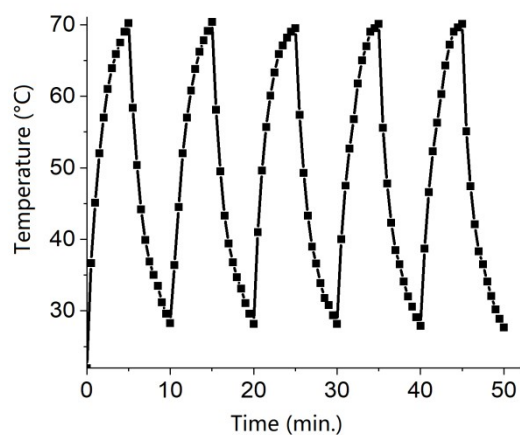

**Fig. S3** Photothermal stability of *t*Bu-azaBDP 1-NPs during five circles of heating-cooling processes.

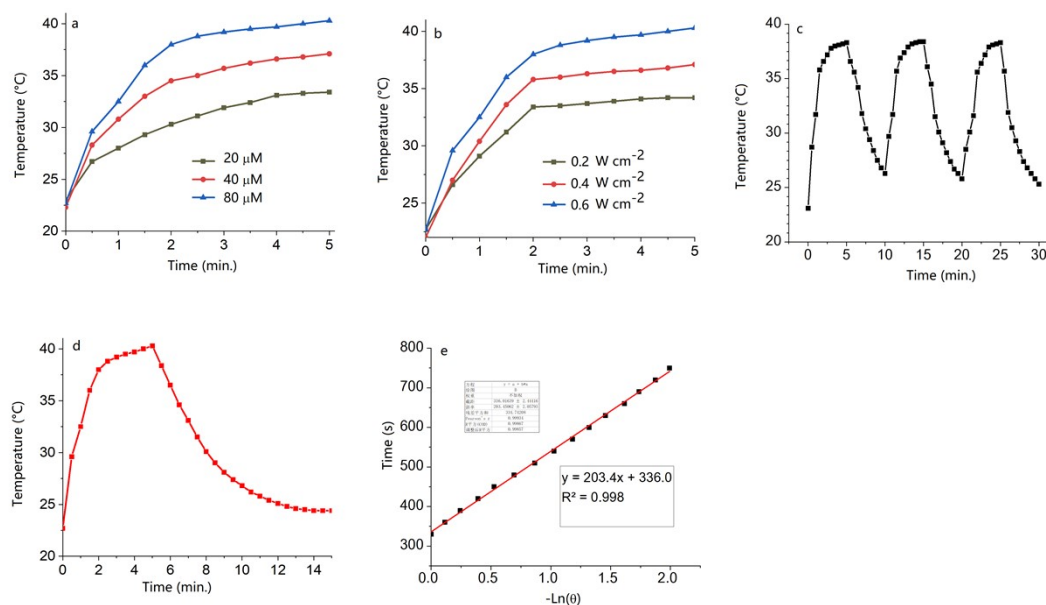

**Fig. S4** a) Temperature changes (22.7-40.3 °C) of *t*Bu-azaBDP 2-NPs at different concentrations (20, 40, 80 μM) under 690 nm laser irradiation (0.6 W·cm<sup>-2</sup>); b) Temperature changes of *t*Bu-azaBDP 2-NPs (80 μM) under 690 nm laser irradiation with different power density (0.2, 0.4, 0.6 W·cm<sup>-2</sup>); c) Photothermal stability during three circles of heating-cooling processes; d) Temperature response curves of *t*Bu-azaBDP 2-NPs in aqueous solutions under irradiation and naturally cooling; e) Linear fitting of  $-\ln\theta$  and time.



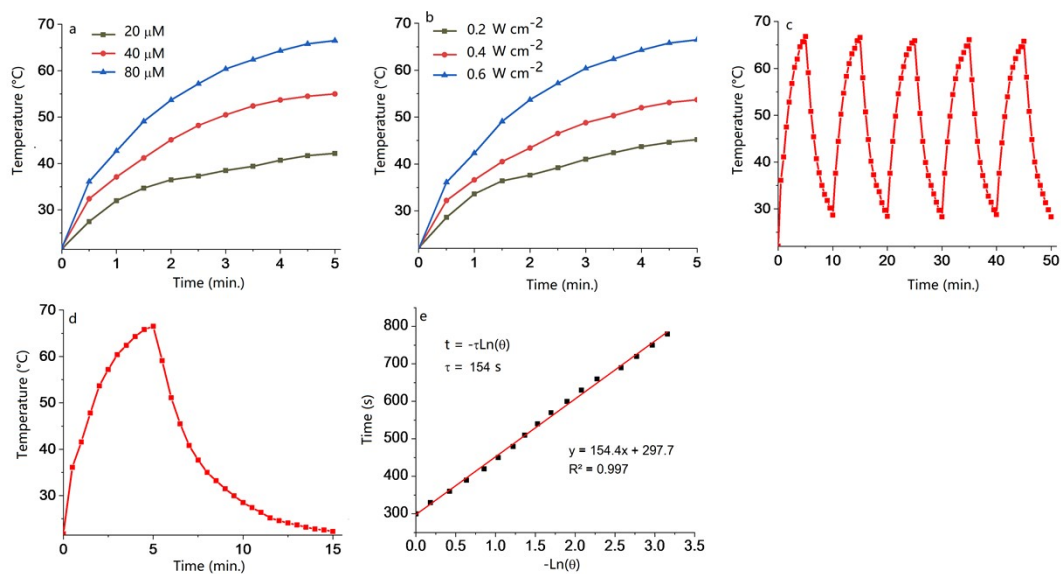

**Fig. S5** a) Temperature changes (21.8-66.5 °C) of **Ph-azaBDP 3-NPs** at different concentrations (20, 40, 80  $\mu\text{M}$ ) under 690 nm laser irradiation ( $0.6 \text{ W}\cdot\text{cm}^{-2}$ ); b) Temperature changes of **Ph-azaBDP 3-NPs** (80  $\mu\text{M}$ ) under 690 nm laser irradiation with different power density ( $0.2, 0.4, 0.6 \text{ W}\cdot\text{cm}^{-2}$ ); c) Photothermal stability during five circles of heating-cooling processes; d) Temperature response curves of **Ph-azaBDP 3-NPs** in aqueous solutions under irradiation and naturally cooling; e) Linear fitting of  $-\text{Ln}\theta$  and time.

### 3. NMR

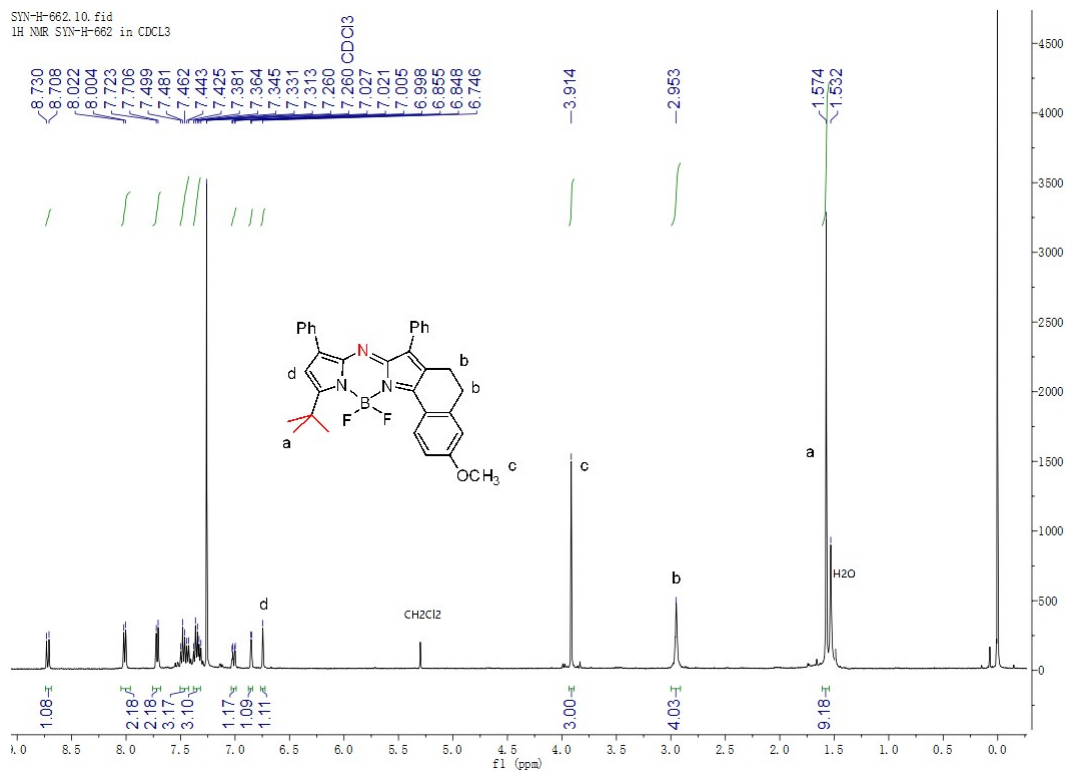

### <sup>1</sup>H NMR for dye 1

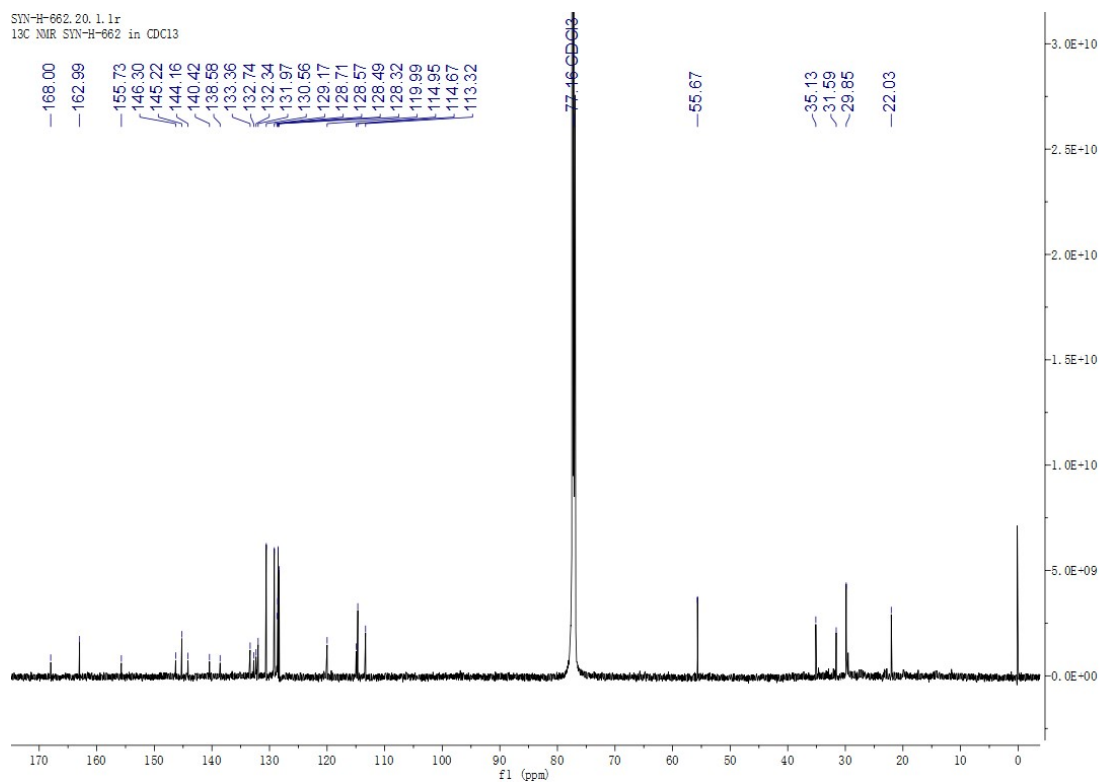

### <sup>13</sup>C NMR for dye 1

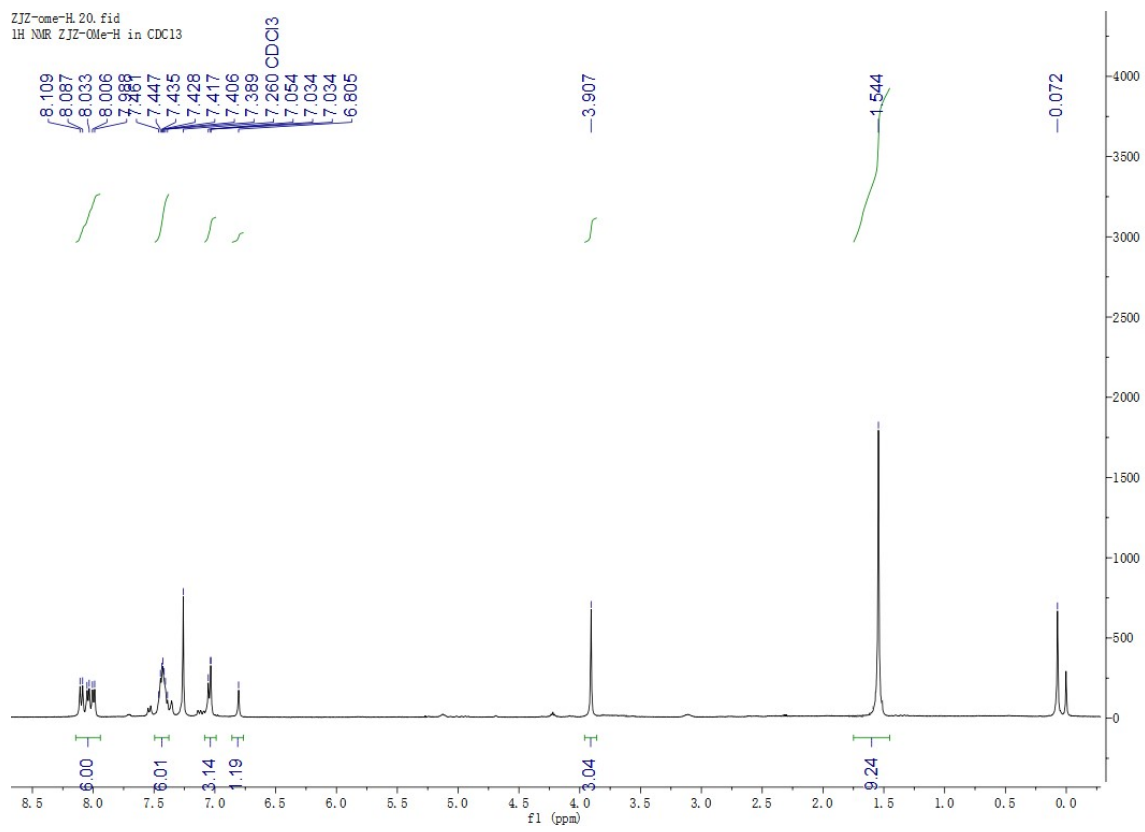

<sup>1</sup>H NMR for dye 2

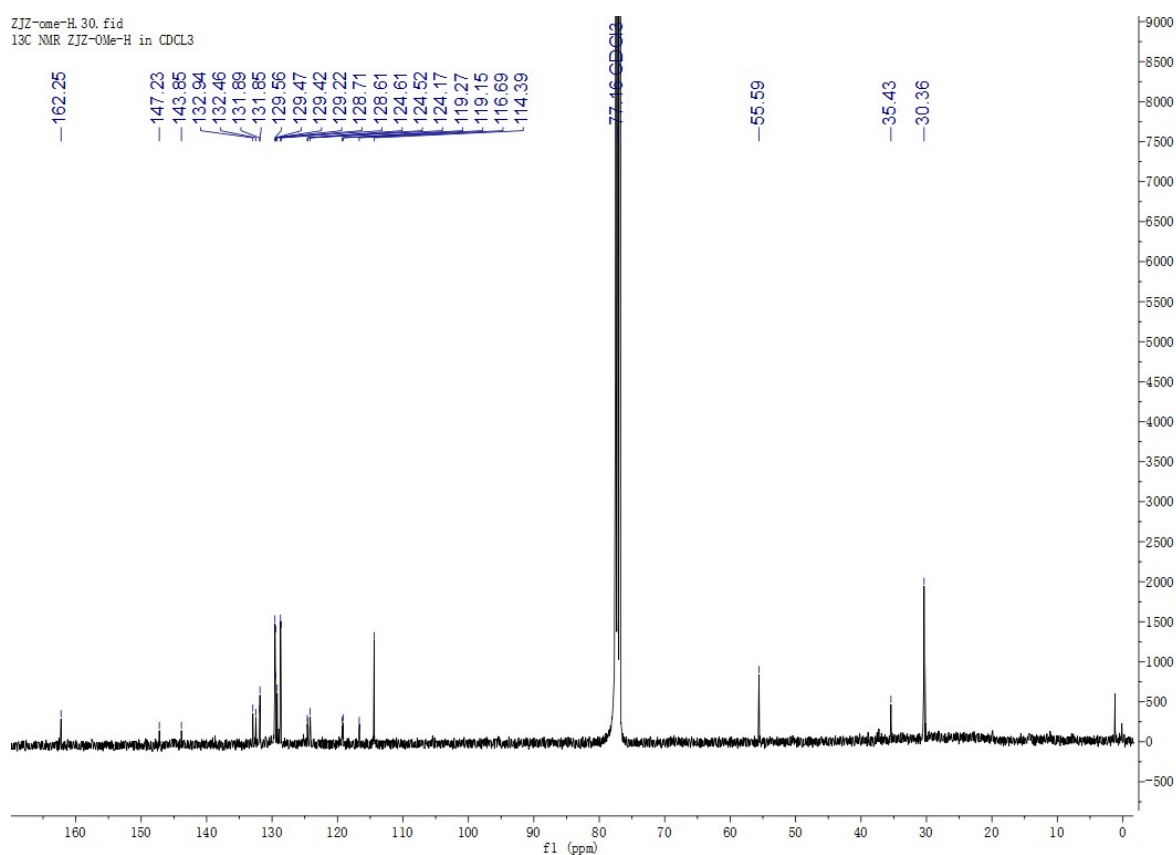

<sup>13</sup>C NMR for dye 2

## 4. HRMS

1-64 #9 RT: 0.08 AV: 1 NL: 1.53E4  
T: FTMS + p ESI Full ms [80.0000-1200.0000]

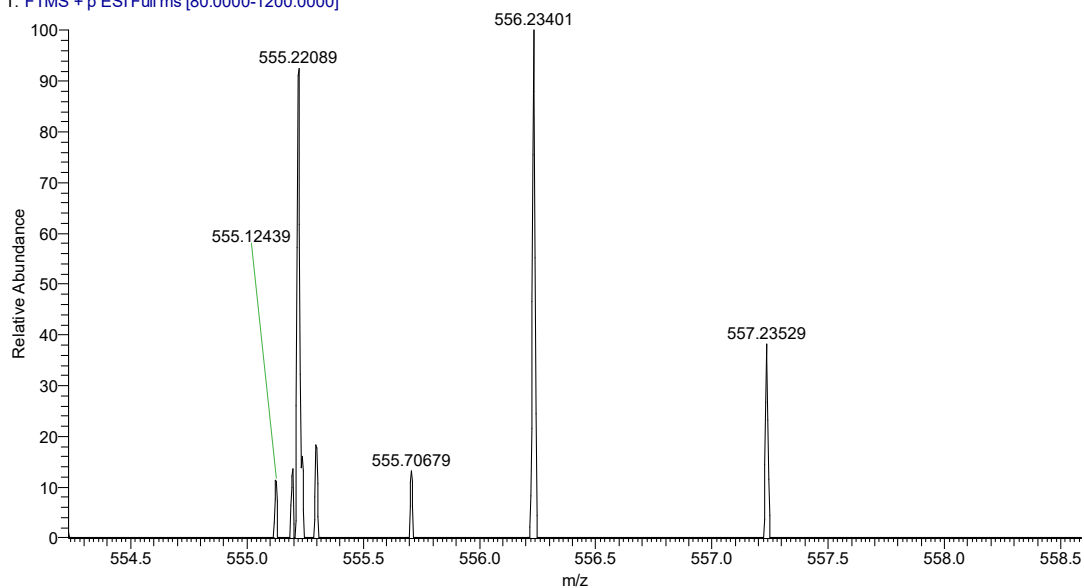

1. HRMS (ESI) m/z calcd for  $C_{33}H_{30}BF_2N_3ONa^+$  (M+Na)<sup>+</sup> 556.23422, found 556.23401.

1-63 #12 RT: 0.10 AV: 1 NL: 1.14E5  
T: FTMS + p ESI Full ms [80.0000-1200.0000]

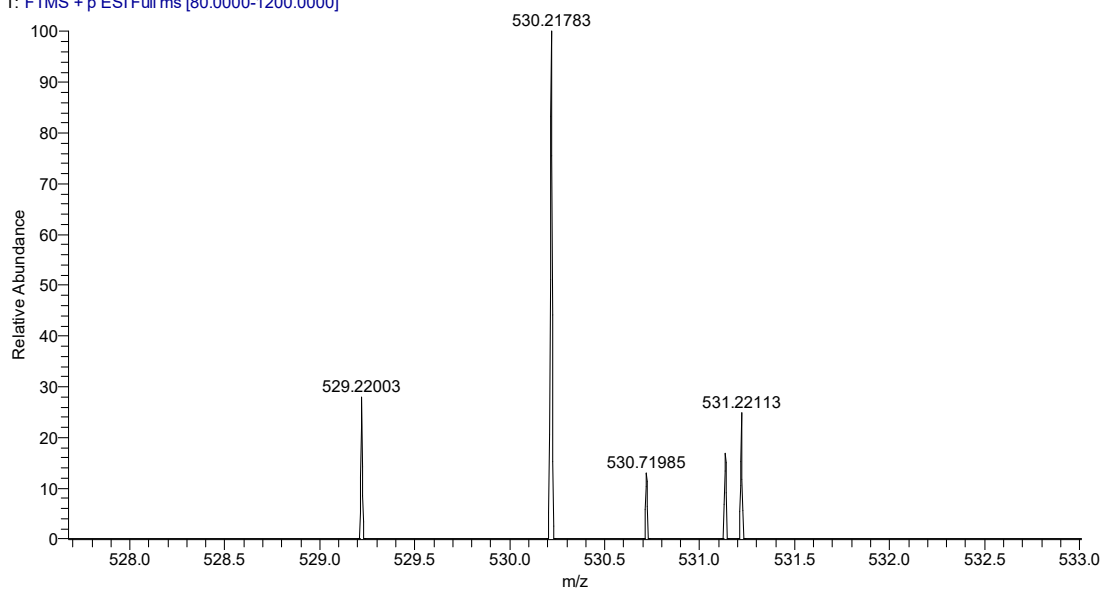

2. HRMS (ESI) m/z calcd for  $C_{31}H_{28}BF_2N_3ONa^+$  (M+Na)<sup>+</sup> 530.21857, found 530.21783.

## 5. X-ray data for *t*Bu-azaBDP 1

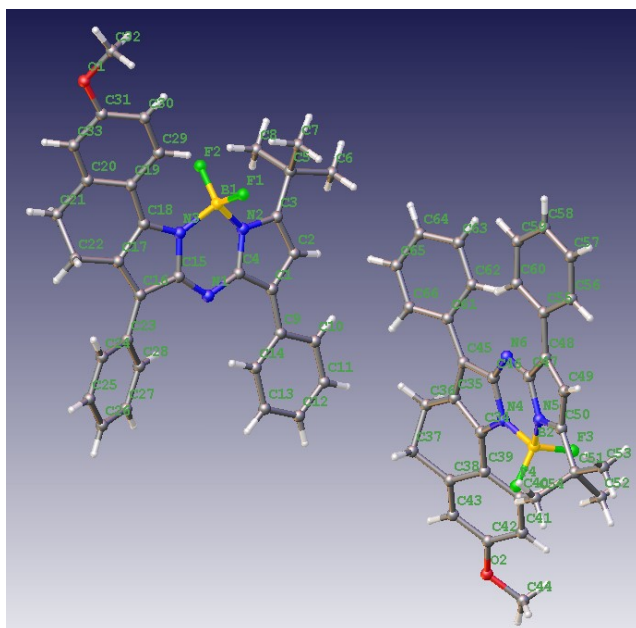

**Table 1** Crystal data and structure refinement for *syn*.

|                                             |                                                                  |
|---------------------------------------------|------------------------------------------------------------------|
| Identification code                         | <i>syn</i>                                                       |
| Empirical formula                           | C <sub>33</sub> H <sub>30</sub> BF <sub>2</sub> N <sub>3</sub> O |
| Formula weight                              | 533.41                                                           |
| Temperature/K                               | 179.99(10)                                                       |
| Crystal system                              | triclinic                                                        |
| Space group                                 | P-1                                                              |
| a/Å                                         | 10.3136(7)                                                       |
| b/Å                                         | 14.8807(9)                                                       |
| c/Å                                         | 17.5862(12)                                                      |
| α/°                                         | 88.651(5)                                                        |
| β/°                                         | 88.668(5)                                                        |
| γ/°                                         | 78.809(5)                                                        |
| Volume/Å <sup>3</sup>                       | 2646.5(3)                                                        |
| Z                                           | 4                                                                |
| ρ <sub>calc</sub> /cm <sup>3</sup>          | 1.339                                                            |
| μ/mm <sup>-1</sup>                          | 0.091                                                            |
| F(000)                                      | 1120.0                                                           |
| Crystal size/mm <sup>3</sup>                | 0.15 × 0.12 × 0.1                                                |
| Radiation                                   | Mo Kα (λ = 0.71073)                                              |
| 2θ range for data collection/°              | 4.432 to 50                                                      |
| Index ranges                                | -12 ≤ h ≤ 12, -17 ≤ k ≤ 17, -20 ≤ l ≤ 20                         |
| Reflections collected                       | 18848                                                            |
| Independent reflections                     | 9325 [R <sub>int</sub> = 0.0642, R <sub>sigma</sub> = 0.0956]    |
| Data/restraints/parameters                  | 9325/0/729                                                       |
| Goodness-of-fit on F <sup>2</sup>           | 1.091                                                            |
| Final R indexes [I ≥ 2σ (I)]                | R <sub>1</sub> = 0.1175, wR <sub>2</sub> = 0.2991                |
| Final R indexes [all data]                  | R <sub>1</sub> = 0.1442, wR <sub>2</sub> = 0.3154                |
| Largest diff. peak/hole / e Å <sup>-3</sup> | 0.70/-0.51                                                       |

### Crystal structure determination of [syn]

**Crystal Data** for  $C_{33}H_{30}BF_2N_3O$  ( $M = 533.41$  g/mol): triclinic, space group P-1 (no. 2),  $a = 10.3136(7)$  Å,  $b = 14.8807(9)$  Å,  $c = 17.5862(12)$  Å,  $\alpha = 88.651(5)^\circ$ ,  $\beta = 88.668(5)^\circ$ ,  $\gamma = 78.809(5)^\circ$ ,  $V = 2646.5(3)$  Å<sup>3</sup>,  $Z = 4$ ,  $T = 179.99(10)$  K,  $\mu(\text{Mo K}\alpha) = 0.091$  mm<sup>-1</sup>,  $D_{\text{calc}} = 1.339$  g/cm<sup>3</sup>, 18848 reflections measured ( $4.432^\circ \leq 2\theta \leq 50^\circ$ ), 9325 unique ( $R_{\text{int}} = 0.0642$ ,  $R_{\text{sigma}} = 0.0956$ ) which were used in all calculations. The final  $R_1$  was 0.1175 ( $I > 2\sigma(I)$ ) and  $wR_2$  was 0.3154 (all data).

**Table 2 Fractional Atomic Coordinates ( $\times 10^4$ ) and Equivalent Isotropic Displacement Parameters ( $\text{Å}^2 \times 10^3$ ) for syn.  $U_{\text{eq}}$  is defined as 1/3 of the trace of the orthogonalised  $U_{ij}$  tensor.**

| Atom | x        | y        | z          | U(eq)    |
|------|----------|----------|------------|----------|
| F1   | -1528(3) | 7890(2)  | 5262.7(17) | 32.6(8)  |
| F2   | -516(3)  | 8626(2)  | 4348.6(17) | 31.5(8)  |
| O1   | -6035(5) | 10451(4) | 2980(3)    | 64.2(16) |
| N1   | 554(4)   | 5841(3)  | 4329(2)    | 23.8(10) |
| N2   | 735(4)   | 7239(3)  | 4949(2)    | 24.3(10) |
| N3   | -1054(4) | 7190(3)  | 4033(2)    | 22.8(10) |
| C1   | 2244(5)  | 5940(4)  | 5270(3)    | 25.7(12) |
| C2   | 2515(6)  | 6684(4)  | 5647(3)    | 28.4(12) |
| C3   | 1611(5)  | 7471(4)  | 5455(3)    | 27.3(12) |
| C4   | 1119(5)  | 6297(4)  | 4818(3)    | 23.9(12) |
| C5   | 1651(6)  | 8439(4)  | 5703(3)    | 31.3(13) |
| C6   | 2686(7)  | 8375(4)  | 6330(4)    | 40.6(16) |
| C7   | 331(6)   | 8945(4)  | 6032(4)    | 37.6(15) |
| C8   | 2110(7)  | 8987(4)  | 5028(4)    | 40.6(15) |
| C9   | 3008(5)  | 5000(4)  | 5317(3)    | 26.0(12) |
| C10  | 4082(6)  | 4806(4)  | 5803(4)    | 40.8(16) |
| C11  | 4838(7)  | 3936(4)  | 5860(4)    | 45.7(17) |
| C12  | 4558(6)  | 3236(4)  | 5434(4)    | 37.6(15) |
| C13  | 3506(6)  | 3411(4)  | 4949(4)    | 35.3(14) |
| C14  | 2731(6)  | 4284(4)  | 4891(3)    | 31.5(13) |
| C15  | -453(5)  | 6271(4)  | 3927(3)    | 23.6(11) |
| C16  | -1072(5) | 5920(4)  | 3300(3)    | 24.8(12) |
| C17  | -1997(6) | 6643(4)  | 3031(3)    | 28.6(13) |
| C18  | -2003(5) | 7410(4)  | 3508(3)    | 25.6(12) |
| C19  | -2969(6) | 8243(4)  | 3414(3)    | 29.5(13) |
| C20  | -3586(6) | 8392(4)  | 2695(3)    | 35.6(14) |
| C21  | -3108(7) | 7728(4)  | 2067(3)    | 42.0(16) |
| C22  | -2908(6) | 6742(4)  | 2371(3)    | 36.5(15) |
| C23  | -764(5)  | 4976(4)  | 3018(3)    | 25.2(12) |
| C24  | -1755(6) | 4606(4)  | 2689(4)    | 38.2(15) |
| C25  | -1499(7) | 3731(5)  | 2414(4)    | 46.7(17) |
| C26  | -240(7)  | 3190(5)  | 2475(4)    | 47.1(17) |
| C27  | 747(7)   | 3548(4)  | 2786(4)    | 45.1(16) |
| C28  | 494(6)   | 4438(4)  | 3067(4)    | 38.6(15) |
| C29  | -3423(6) | 8869(4)  | 3985(3)    | 30.6(13) |

**Table 2 Fractional Atomic Coordinates ( $\times 10^4$ ) and Equivalent Isotropic Displacement Parameters ( $\text{\AA}^2 \times 10^3$ ) for syn.  $U_{\text{eq}}$  is defined as 1/3 of of the trace of the orthogonalised  $U_{ij}$  tensor.**

| Atom | x        | y        | z           | U(eq)    |
|------|----------|----------|-------------|----------|
| C30  | -4440(6) | 9612(4)  | 3868(3)     | 34.5(14) |
| C31  | -5032(6) | 9745(5)  | 3167(3)     | 41.0(16) |
| C32  | -6624(7) | 11032(5) | 3573(4)     | 54(2)    |
| C33  | -4583(7) | 9135(5)  | 2584(3)     | 45.4(18) |
| B1   | -612(6)  | 7774(4)  | 4667(3)     | 26.1(14) |
| F3   | 6419(3)  | 2059(2)  | 10197.6(17) | 32.2(8)  |
| F4   | 5471(3)  | 1362(2)  | 9280.6(17)  | 31.4(8)  |
| O2   | 11214(5) | -260(3)  | 7955(3)     | 54.0(14) |
| N4   | 5993(4)  | 2834(3)  | 8984(2)     | 24.9(10) |
| N5   | 4139(4)  | 2699(3)  | 9893(2)     | 24.6(10) |
| N6   | 4323(4)  | 4133(3)  | 9277(2)     | 24.9(10) |
| C34  | 6964(5)  | 2656(4)  | 8446(3)     | 24.6(12) |
| C35  | 6951(5)  | 3443(4)  | 7963(3)     | 27.2(12) |
| C36  | 7920(6)  | 3386(4)  | 7313(3)     | 33.8(14) |
| C37  | 8184(7)  | 2414(4)  | 7016(3)     | 38.5(15) |
| C38  | 8654(6)  | 1731(4)  | 7639(3)     | 32.5(13) |
| C39  | 7991(5)  | 1835(4)  | 8360(3)     | 26.3(12) |
| C40  | 8449(6)  | 1220(4)  | 8943(3)     | 30.1(13) |
| C41  | 9516(6)  | 508(4)   | 8835(3)     | 33.4(14) |
| C42  | 10153(6) | 408(4)   | 8125(4)     | 37.5(15) |
| C43  | 9713(6)  | 1022(4)  | 7544(4)     | 39.3(15) |
| C44  | 11756(8) | -882(5)  | 8539(4)     | 58(2)    |
| C45  | 6006(5)  | 4157(4)  | 8259(3)     | 25.5(12) |
| C46  | 5378(5)  | 3747(4)  | 8887(3)     | 23.1(11) |
| C47  | 3739(5)  | 3642(4)  | 9765(3)     | 23.7(11) |
| C48  | 2578(6)  | 3965(4)  | 10225(3)    | 27.4(12) |
| C49  | 2305(6)  | 3200(4)  | 10605(3)    | 28.6(13) |
| C50  | 3248(6)  | 2435(4)  | 10410(3)    | 27.1(12) |
| C51  | 3200(6)  | 1457(4)  | 10662(3)    | 30.8(13) |
| C52  | 4525(6)  | 928(4)   | 10950(4)    | 39.0(15) |
| C53  | 2186(7)  | 1473(4)  | 11311(4)    | 42.5(16) |
| C54  | 2768(7)  | 950(4)   | 9986(4)     | 40.1(15) |
| C55  | 1852(5)  | 4927(4)  | 10296(3)    | 27.6(12) |
| C56  | 1000(6)  | 5135(4)  | 10915(4)    | 38.1(15) |
| C57  | 303(7)   | 6025(5)  | 11008(4)    | 47.2(17) |
| C58  | 467(7)   | 6707(4)  | 10503(4)    | 45.8(17) |
| C59  | 1302(7)  | 6497(5)  | 9901(5)     | 52.4(19) |
| C60  | 1986(7)  | 5612(4)  | 9785(4)     | 43.6(16) |
| C61  | 5670(5)  | 5127(4)  | 8023(3)     | 24.7(12) |
| C62  | 5096(6)  | 5794(4)  | 8552(3)     | 34.1(14) |
| C63  | 4808(6)  | 6716(4)  | 8351(4)     | 38.3(15) |
| C64  | 5086(6)  | 6992(4)  | 7605(3)     | 36.9(15) |
| C65  | 5619(7)  | 6367(5)  | 7101(4)     | 42.3(16) |
| C66  | 5902(6)  | 5448(4)  | 7294(3)     | 36.2(14) |

**Table 2 Fractional Atomic Coordinates ( $\times 10^4$ ) and Equivalent Isotropic Displacement Parameters ( $\text{\AA}^2 \times 10^3$ ) for syn.  $U_{\text{eq}}$  is defined as 1/3 of of the trace of the orthogonalised  $U_{ij}$  tensor.**

| Atom | x       | y       | z       | $U_{\text{eq}}$ |
|------|---------|---------|---------|-----------------|
| B2   | 5523(6) | 2189(4) | 9600(3) | 25.8(14)        |

**Table 3 Anisotropic Displacement Parameters ( $\text{\AA}^2 \times 10^3$ ) for syn. The Anisotropic displacement factor exponent takes the form:  $-2\pi^2[h^2a^*2U_{11}+2hka^*b^*U_{12}+\dots]$ .**

| Atom | $U_{11}$ | $U_{22}$ | $U_{33}$ | $U_{23}$ | $U_{13}$ | $U_{12}$ |
|------|----------|----------|----------|----------|----------|----------|
| F1   | 28.1(18) | 41.6(19) | 25.3(17) | -8.2(14) | 0.8(13)  | 1.3(15)  |
| F2   | 34.2(19) | 28.9(17) | 28.2(17) | -0.7(13) | -6.1(14) | 2.3(15)  |
| O1   | 67(4)    | 67(3)    | 35(3)    | 0(2)     | -7(2)    | 45(3)    |
| N1   | 23(2)    | 29(2)    | 18(2)    | 3.7(18)  | -0.4(18) | -4(2)    |
| N2   | 23(2)    | 26(2)    | 21(2)    | -0.5(18) | -2.8(18) | 0(2)     |
| N3   | 20(2)    | 28(2)    | 19(2)    | -0.6(18) | -1.4(17) | 0.8(19)  |
| C1   | 26(3)    | 28(3)    | 23(3)    | 3(2)     | -1(2)    | -4(2)    |
| C2   | 24(3)    | 32(3)    | 29(3)    | 1(2)     | -9(2)    | -5(2)    |
| C3   | 24(3)    | 32(3)    | 26(3)    | -1(2)    | -2(2)    | -5(2)    |
| C4   | 25(3)    | 22(3)    | 24(3)    | 1(2)     | -5(2)    | -3(2)    |
| C5   | 32(3)    | 28(3)    | 33(3)    | -3(2)    | -11(3)   | -4(3)    |
| C6   | 44(4)    | 35(3)    | 43(4)    | -4(3)    | -18(3)   | -4(3)    |
| C7   | 40(4)    | 34(3)    | 36(3)    | -13(3)   | -4(3)    | 3(3)     |
| C8   | 43(4)    | 33(3)    | 45(4)    | -1(3)    | -6(3)    | -5(3)    |
| C9   | 24(3)    | 28(3)    | 24(3)    | 5(2)     | -1(2)    | -1(2)    |
| C10  | 35(4)    | 36(3)    | 48(4)    | 2(3)     | -14(3)   | 1(3)     |
| C11  | 34(4)    | 37(4)    | 62(4)    | 8(3)     | -22(3)   | 5(3)     |
| C12  | 32(3)    | 28(3)    | 50(4)    | 4(3)     | 5(3)     | 2(3)     |
| C13  | 38(4)    | 26(3)    | 42(4)    | -4(3)    | 3(3)     | -5(3)    |
| C14  | 32(3)    | 31(3)    | 30(3)    | 2(2)     | -3(2)    | -1(3)    |
| C15  | 22(3)    | 25(3)    | 22(3)    | 1(2)     | 1(2)     | 0(2)     |
| C16  | 25(3)    | 32(3)    | 18(3)    | -2(2)    | -2(2)    | -6(2)    |
| C17  | 24(3)    | 38(3)    | 23(3)    | 0(2)     | -3(2)    | -3(3)    |
| C18  | 23(3)    | 32(3)    | 20(3)    | 1(2)     | -1(2)    | -3(2)    |
| C19  | 29(3)    | 34(3)    | 23(3)    | 3(2)     | -3(2)    | -1(3)    |
| C20  | 36(3)    | 40(3)    | 26(3)    | -1(3)    | -3(3)    | 6(3)     |
| C21  | 48(4)    | 47(4)    | 23(3)    | 0(3)     | -9(3)    | 12(3)    |
| C22  | 35(3)    | 43(4)    | 28(3)    | -8(3)    | -10(3)   | 5(3)     |
| C23  | 29(3)    | 29(3)    | 18(3)    | 0(2)     | -1(2)    | -6(2)    |
| C24  | 34(4)    | 39(3)    | 43(4)    | -4(3)    | -3(3)    | -11(3)   |
| C25  | 52(5)    | 53(4)    | 41(4)    | -6(3)    | -8(3)    | -23(4)   |
| C26  | 56(5)    | 37(4)    | 51(4)    | -23(3)   | 10(3)    | -16(3)   |
| C27  | 42(4)    | 35(3)    | 56(4)    | -5(3)    | -6(3)    | -1(3)    |
| C28  | 38(4)    | 32(3)    | 48(4)    | -2(3)    | -10(3)   | -10(3)   |
| C29  | 28(3)    | 37(3)    | 23(3)    | 1(2)     | -5(2)    | 2(3)     |
| C30  | 33(3)    | 35(3)    | 30(3)    | -1(3)    | 0(3)     | 8(3)     |
| C31  | 37(4)    | 45(4)    | 31(3)    | 4(3)     | -2(3)    | 17(3)    |
| C32  | 51(4)    | 53(4)    | 44(4)    | 0(3)     | 3(3)     | 30(4)    |
| C33  | 50(4)    | 52(4)    | 24(3)    | 3(3)     | -12(3)   | 18(3)    |



**Table 2 Fractional Atomic Coordinates ( $\times 10^4$ ) and Equivalent Isotropic Displacement Parameters ( $\text{\AA}^2 \times 10^3$ ) for syn.  $U_{\text{eq}}$  is defined as 1/3 of the trace of the orthogonalised  $U_{ij}$  tensor.**

| Atom | x        | y        |          | z        |          | U(eq)   |
|------|----------|----------|----------|----------|----------|---------|
| B1   | 26(3)    | 26(3)    | 24(3)    | -5(3)    | -2(3)    | 2(3)    |
| F3   | 30.5(18) | 39.3(19) | 22.7(16) | 3.0(14)  | -1.9(13) | 3.4(15) |
| F4   | 36.7(19) | 25.7(17) | 28.5(17) | -2.0(13) | 4.2(14)  | 2.0(15) |
| O2   | 52(3)    | 59(3)    | 34(2)    | 0(2)     | 5(2)     | 30(2)   |
| N4   | 26(3)    | 26(2)    | 22(2)    | -0.4(19) | 1.4(19)  | -3(2)   |
| N5   | 28(3)    | 26(2)    | 18(2)    | 3.3(18)  | 2.8(18)  | -3(2)   |
| N6   | 23(2)    | 31(2)    | 20(2)    | -0.5(19) | 1.6(18)  | -4(2)   |
| C34  | 24(3)    | 28(3)    | 21(3)    | -3(2)    | 0(2)     | -4(2)   |
| C35  | 27(3)    | 26(3)    | 26(3)    | 1(2)     | 0(2)     | -1(2)   |
| C36  | 32(3)    | 35(3)    | 30(3)    | 3(3)     | 6(2)     | 2(3)    |
| C37  | 43(4)    | 40(3)    | 28(3)    | -3(3)    | 10(3)    | 2(3)    |
| C38  | 32(3)    | 35(3)    | 28(3)    | -7(2)    | 3(2)     | 1(3)    |
| C39  | 23(3)    | 31(3)    | 23(3)    | -2(2)    | 1(2)     | -2(2)   |
| C40  | 28(3)    | 32(3)    | 29(3)    | -2(2)    | 3(2)     | -2(3)   |
| C41  | 29(3)    | 34(3)    | 33(3)    | -1(3)    | -3(2)    | 5(3)    |
| C42  | 35(4)    | 36(3)    | 37(3)    | -9(3)    | -3(3)    | 4(3)    |
| C43  | 39(4)    | 43(4)    | 30(3)    | -4(3)    | 8(3)     | 4(3)    |
| C44  | 46(4)    | 56(5)    | 57(5)    | -4(4)    | -5(3)    | 28(4)   |
| C45  | 24(3)    | 34(3)    | 17(3)    | 0(2)     | 1(2)     | -3(2)   |
| C46  | 23(3)    | 24(3)    | 22(3)    | 1(2)     | -4(2)    | -3(2)   |
| C47  | 25(3)    | 23(3)    | 24(3)    | 0(2)     | -1(2)    | -6(2)   |
| C48  | 27(3)    | 30(3)    | 25(3)    | -2(2)    | -2(2)    | -5(2)   |
| C49  | 25(3)    | 29(3)    | 30(3)    | -2(2)    | 7(2)     | -1(2)   |
| C50  | 27(3)    | 32(3)    | 22(3)    | 2(2)     | -2(2)    | -4(2)   |
| C51  | 35(3)    | 30(3)    | 26(3)    | 3(2)     | 4(2)     | -3(3)   |
| C52  | 46(4)    | 29(3)    | 40(4)    | 9(3)     | 3(3)     | -5(3)   |
| C53  | 48(4)    | 33(3)    | 44(4)    | 3(3)     | 16(3)    | -5(3)   |
| C54  | 46(4)    | 33(3)    | 42(4)    | -2(3)    | 5(3)     | -9(3)   |
| C55  | 23(3)    | 28(3)    | 31(3)    | -3(2)    | -2(2)    | -3(2)   |
| C56  | 34(3)    | 37(3)    | 40(4)    | -4(3)    | 1(3)     | 0(3)    |
| C57  | 45(4)    | 45(4)    | 49(4)    | -17(3)   | 2(3)     | 0(3)    |
| C58  | 35(4)    | 30(3)    | 67(5)    | -14(3)   | -6(3)    | 8(3)    |
| C59  | 47(4)    | 32(4)    | 73(5)    | 12(3)    | 4(4)     | 1(3)    |
| C60  | 37(4)    | 34(3)    | 53(4)    | 5(3)     | 13(3)    | 7(3)    |
| C61  | 24(3)    | 26(3)    | 25(3)    | 1(2)     | -8(2)    | -5(2)   |
| C62  | 41(4)    | 36(3)    | 29(3)    | 1(3)     | 1(3)     | -16(3)  |
| C63  | 41(4)    | 35(3)    | 42(4)    | -6(3)    | -3(3)    | -12(3)  |
| C64  | 41(4)    | 33(3)    | 36(3)    | 6(3)     | -13(3)   | -3(3)   |
| C65  | 55(4)    | 44(4)    | 30(3)    | 7(3)     | -1(3)    | -18(3)  |
| C66  | 47(4)    | 32(3)    | 29(3)    | 1(3)     | 2(3)     | -7(3)   |
| B2   | 27(3)    | 29(3)    | 21(3)    | 3(3)     | 0(2)     | -5(3)   |

**Table 4 Bond Lengths for syn.**

| Atom | Atom | Length/ $\text{\AA}$ | Atom | Atom | Length/ $\text{\AA}$ |
|------|------|----------------------|------|------|----------------------|
|------|------|----------------------|------|------|----------------------|

**Table 2 Fractional Atomic Coordinates ( $\times 10^4$ ) and Equivalent Isotropic Displacement Parameters ( $\text{\AA}^2 \times 10^3$ ) for syn.  $U_{\text{eq}}$  is defined as 1/3 of the trace of the orthogonalised  $U_{ij}$  tensor.**

| Atom |     | x         | y   |     | z         | U(eq) |
|------|-----|-----------|-----|-----|-----------|-------|
| F1   | B1  | 1.385(7)  | F3  | B2  | 1.401(7)  |       |
| F2   | B1  | 1.393(7)  | F4  | B2  | 1.375(7)  |       |
| O1   | C31 | 1.363(7)  | O2  | C42 | 1.360(7)  |       |
| O1   | C32 | 1.419(8)  | O2  | C44 | 1.416(8)  |       |
| N1   | C4  | 1.320(7)  | N4  | C34 | 1.353(7)  |       |
| N1   | C15 | 1.321(7)  | N4  | C46 | 1.392(7)  |       |
| N2   | C3  | 1.379(7)  | N4  | B2  | 1.562(7)  |       |
| N2   | C4  | 1.404(7)  | N5  | C47 | 1.399(7)  |       |
| N2   | B1  | 1.548(7)  | N5  | C50 | 1.382(7)  |       |
| N3   | C15 | 1.403(7)  | N5  | B2  | 1.563(8)  |       |
| N3   | C18 | 1.349(7)  | N6  | C46 | 1.313(7)  |       |
| N3   | B1  | 1.560(7)  | N6  | C47 | 1.323(7)  |       |
| C1   | C2  | 1.381(8)  | C34 | C35 | 1.428(8)  |       |
| C1   | C4  | 1.429(7)  | C34 | C39 | 1.462(8)  |       |
| C1   | C9  | 1.468(8)  | C35 | C36 | 1.494(8)  |       |
| C2   | C3  | 1.388(8)  | C35 | C45 | 1.396(8)  |       |
| C3   | C5  | 1.524(8)  | C36 | C37 | 1.521(8)  |       |
| C5   | C6  | 1.541(8)  | C37 | C38 | 1.500(9)  |       |
| C5   | C7  | 1.530(8)  | C38 | C39 | 1.424(8)  |       |
| C5   | C8  | 1.542(9)  | C38 | C43 | 1.374(8)  |       |
| C9   | C10 | 1.396(8)  | C39 | C40 | 1.385(8)  |       |
| C9   | C14 | 1.393(8)  | C40 | C41 | 1.384(8)  |       |
| C10  | C11 | 1.379(9)  | C41 | C42 | 1.396(9)  |       |
| C11  | C12 | 1.376(9)  | C42 | C43 | 1.378(9)  |       |
| C12  | C13 | 1.377(9)  | C45 | C46 | 1.450(7)  |       |
| C13  | C14 | 1.390(8)  | C45 | C61 | 1.469(8)  |       |
| C15  | C16 | 1.443(7)  | C47 | C48 | 1.438(8)  |       |
| C16  | C17 | 1.375(8)  | C48 | C49 | 1.379(8)  |       |
| C16  | C23 | 1.473(8)  | C48 | C55 | 1.487(8)  |       |
| C17  | C18 | 1.431(8)  | C49 | C50 | 1.390(8)  |       |
| C17  | C22 | 1.497(8)  | C50 | C51 | 1.520(8)  |       |
| C18  | C19 | 1.441(8)  | C51 | C52 | 1.530(8)  |       |
| C19  | C20 | 1.422(8)  | C51 | C53 | 1.527(8)  |       |
| C19  | C29 | 1.395(8)  | C51 | C54 | 1.543(8)  |       |
| C20  | C21 | 1.508(8)  | C55 | C56 | 1.384(8)  |       |
| C20  | C33 | 1.370(8)  | C55 | C60 | 1.368(9)  |       |
| C21  | C22 | 1.527(9)  | C56 | C57 | 1.390(9)  |       |
| C23  | C24 | 1.395(8)  | C57 | C58 | 1.365(10) |       |
| C23  | C28 | 1.390(8)  | C58 | C59 | 1.352(10) |       |
| C24  | C25 | 1.374(9)  | C59 | C60 | 1.385(9)  |       |
| C25  | C26 | 1.393(10) | C61 | C62 | 1.411(8)  |       |
| C26  | C27 | 1.367(9)  | C61 | C66 | 1.390(8)  |       |
| C27  | C28 | 1.399(9)  | C62 | C63 | 1.387(9)  |       |
| C29  | C30 | 1.383(8)  | C63 | C64 | 1.405(9)  |       |

**Table 2 Fractional Atomic Coordinates ( $\times 10^4$ ) and Equivalent Isotropic Displacement Parameters ( $\text{\AA}^2 \times 10^3$ ) for syn.  $U_{\text{eq}}$  is defined as 1/3 of the trace of the orthogonalised  $U_{ij}$  tensor.**

| Atom    | x        | y       | z        | $U_{\text{eq}}$ |
|---------|----------|---------|----------|-----------------|
| C30 C31 | 1.380(8) | C64 C65 | 1.330(9) |                 |
| C31 C33 | 1.396(9) | C65 C66 | 1.377(9) |                 |

**Table 5 Bond Angles for syn.**

| Atom | Atom | Atom | Angle/ $^\circ$ | Atom | Atom | Atom | Angle/ $^\circ$ |
|------|------|------|-----------------|------|------|------|-----------------|
| C31  | O1   | C32  | 117.6(5)        | C42  | O2   | C44  | 118.7(5)        |
| C4   | N1   | C15  | 120.0(5)        | C34  | N4   | C46  | 107.2(4)        |
| C3   | N2   | C4   | 107.4(4)        | C34  | N4   | B2   | 130.4(5)        |
| C3   | N2   | B1   | 131.0(5)        | C46  | N4   | B2   | 122.4(4)        |
| C4   | N2   | B1   | 120.4(4)        | C47  | N5   | B2   | 120.3(4)        |
| C15  | N3   | B1   | 121.9(4)        | C50  | N5   | C47  | 107.1(4)        |
| C18  | N3   | C15  | 107.4(4)        | C50  | N5   | B2   | 131.3(4)        |
| C18  | N3   | B1   | 130.7(5)        | C46  | N6   | C47  | 120.4(5)        |
| C2   | C1   | C4   | 105.3(5)        | N4   | C34  | C35  | 110.2(5)        |
| C2   | C1   | C9   | 125.9(5)        | N4   | C34  | C39  | 128.6(5)        |
| C4   | C1   | C9   | 128.9(5)        | C35  | C34  | C39  | 121.0(5)        |
| C1   | C2   | C3   | 110.4(5)        | C34  | C35  | C36  | 119.0(5)        |
| N2   | C3   | C2   | 108.3(5)        | C45  | C35  | C34  | 107.6(5)        |
| N2   | C3   | C5   | 125.6(5)        | C45  | C35  | C36  | 133.2(5)        |
| C2   | C3   | C5   | 125.9(5)        | C35  | C36  | C37  | 108.7(5)        |
| N1   | C4   | N2   | 124.6(5)        | C38  | C37  | C36  | 111.0(5)        |
| N1   | C4   | C1   | 126.7(5)        | C39  | C38  | C37  | 118.6(5)        |
| N2   | C4   | C1   | 108.7(4)        | C43  | C38  | C37  | 122.5(5)        |
| C3   | C5   | C6   | 108.2(5)        | C43  | C38  | C39  | 118.9(5)        |
| C3   | C5   | C7   | 113.2(5)        | C38  | C39  | C34  | 116.0(5)        |
| C3   | C5   | C8   | 109.6(5)        | C40  | C39  | C34  | 125.0(5)        |
| C6   | C5   | C8   | 107.5(5)        | C40  | C39  | C38  | 118.6(5)        |
| C7   | C5   | C6   | 107.5(5)        | C41  | C40  | C39  | 121.6(5)        |
| C7   | C5   | C8   | 110.6(5)        | C40  | C41  | C42  | 119.3(6)        |
| C10  | C9   | C1   | 118.9(5)        | O2   | C42  | C41  | 124.5(6)        |
| C14  | C9   | C1   | 123.4(5)        | O2   | C42  | C43  | 116.0(6)        |
| C14  | C9   | C10  | 117.7(5)        | C43  | C42  | C41  | 119.4(6)        |
| C11  | C10  | C9   | 121.0(6)        | C38  | C43  | C42  | 122.1(6)        |
| C12  | C11  | C10  | 120.7(6)        | C35  | C45  | C46  | 105.1(5)        |
| C11  | C12  | C13  | 119.3(6)        | C35  | C45  | C61  | 130.2(5)        |
| C12  | C13  | C14  | 120.5(6)        | C46  | C45  | C61  | 124.7(5)        |
| C13  | C14  | C9   | 120.8(5)        | N4   | C46  | C45  | 109.6(5)        |
| N1   | C15  | N3   | 123.4(5)        | N6   | C46  | N4   | 123.6(5)        |
| N1   | C15  | C16  | 127.6(5)        | N6   | C46  | C45  | 126.6(5)        |
| N3   | C15  | C16  | 108.9(4)        | N5   | C47  | C48  | 108.7(5)        |
| C15  | C16  | C23  | 126.3(5)        | N6   | C47  | N5   | 124.5(5)        |
| C17  | C16  | C15  | 105.9(5)        | N6   | C47  | C48  | 126.7(5)        |
| C17  | C16  | C23  | 127.8(5)        | C47  | C48  | C55  | 127.2(5)        |
| C16  | C17  | C18  | 108.1(5)        | C49  | C48  | C47  | 105.5(5)        |

**Table 2 Fractional Atomic Coordinates ( $\times 10^4$ ) and Equivalent Isotropic Displacement Parameters ( $\text{\AA}^2 \times 10^3$ ) for syn.  $U_{\text{eq}}$  is defined as 1/3 of the trace of the orthogonalised  $U_{ij}$  tensor.**

| Atom |     | x   | y        | z   |     |     | U(eq)    |
|------|-----|-----|----------|-----|-----|-----|----------|
| C16  | C17 | C22 | 132.3(5) | C49 | C48 | C55 | 127.2(5) |
| C18  | C17 | C22 | 119.5(5) | C48 | C49 | C50 | 109.8(5) |
| N3   | C18 | C17 | 109.7(5) | N5  | C50 | C49 | 108.9(5) |
| N3   | C18 | C19 | 129.3(5) | N5  | C50 | C51 | 126.1(5) |
| C17  | C18 | C19 | 121.0(5) | C49 | C50 | C51 | 124.7(5) |
| C20  | C19 | C18 | 116.5(5) | C50 | C51 | C52 | 113.1(5) |
| C29  | C19 | C18 | 125.5(5) | C50 | C51 | C53 | 109.3(5) |
| C29  | C19 | C20 | 117.7(5) | C50 | C51 | C54 | 108.8(5) |
| C19  | C20 | C21 | 118.8(5) | C52 | C51 | C54 | 109.2(5) |
| C33  | C20 | C19 | 119.7(5) | C53 | C51 | C52 | 107.5(5) |
| C33  | C20 | C21 | 121.5(5) | C53 | C51 | C54 | 108.8(5) |
| C20  | C21 | C22 | 110.6(5) | C56 | C55 | C48 | 117.9(5) |
| C17  | C22 | C21 | 108.6(5) | C60 | C55 | C48 | 123.4(5) |
| C24  | C23 | C16 | 119.6(5) | C60 | C55 | C56 | 118.6(6) |
| C28  | C23 | C16 | 121.9(5) | C55 | C56 | C57 | 120.1(6) |
| C28  | C23 | C24 | 118.5(5) | C58 | C57 | C56 | 120.8(6) |
| C25  | C24 | C23 | 121.1(6) | C59 | C58 | C57 | 118.7(6) |
| C24  | C25 | C26 | 120.1(6) | C58 | C59 | C60 | 121.7(7) |
| C27  | C26 | C25 | 119.5(6) | C55 | C60 | C59 | 120.1(6) |
| C26  | C27 | C28 | 120.7(6) | C62 | C61 | C45 | 120.1(5) |
| C23  | C28 | C27 | 120.1(6) | C66 | C61 | C45 | 123.7(5) |
| C30  | C29 | C19 | 122.0(5) | C66 | C61 | C62 | 116.2(5) |
| C31  | C30 | C29 | 119.6(6) | C63 | C62 | C61 | 121.2(6) |
| O1   | C31 | C30 | 125.1(6) | C62 | C63 | C64 | 119.4(6) |
| O1   | C31 | C33 | 115.3(5) | C65 | C64 | C63 | 119.7(6) |
| C30  | C31 | C33 | 119.5(5) | C64 | C65 | C66 | 121.4(6) |
| C20  | C33 | C31 | 121.4(6) | C65 | C66 | C61 | 122.0(6) |
| F1   | B1  | F2  | 109.6(5) | F3  | B2  | N4  | 108.8(5) |
| F1   | B1  | N2  | 110.0(5) | F3  | B2  | N5  | 109.8(4) |
| F1   | B1  | N3  | 110.5(5) | F4  | B2  | F3  | 110.1(5) |
| F2   | B1  | N2  | 112.2(5) | F4  | B2  | N4  | 109.3(4) |
| F2   | B1  | N3  | 108.0(4) | F4  | B2  | N5  | 112.4(5) |
| N2   | B1  | N3  | 106.5(4) | N4  | B2  | N5  | 106.3(4) |

**Table 6 Torsion Angles for syn.**

| A  | B   | C   | D   | Angle/°   | A  | B   | C   | D   | Angle/°   |
|----|-----|-----|-----|-----------|----|-----|-----|-----|-----------|
| O1 | C31 | C33 | C20 | -179.5(7) | O2 | C42 | C43 | C38 | -179.9(6) |
| N1 | C15 | C16 | C17 | -175.2(5) | N4 | C34 | C35 | C36 | -178.2(5) |
| N1 | C15 | C16 | C23 | 5.1(9)    | N4 | C34 | C35 | C45 | 5.2(6)    |
| N2 | C3  | C5  | C6  | 174.5(5)  | N4 | C34 | C39 | C38 | 163.8(5)  |
| N2 | C3  | C5  | C7  | 55.5(7)   | N4 | C34 | C39 | C40 | -23.6(9)  |
| N2 | C3  | C5  | C8  | -68.5(7)  | N5 | C47 | C48 | C49 | -1.1(6)   |

**Table 2 Fractional Atomic Coordinates ( $\times 10^4$ ) and Equivalent Isotropic Displacement Parameters ( $\text{\AA}^2 \times 10^3$ ) for syn.  $U_{\text{eq}}$  is defined as 1/3 of the trace of the orthogonalised  $U_{ij}$  tensor.**

| Atom       | x               | y               | z         | U(eq) |
|------------|-----------------|-----------------|-----------|-------|
| N3 C15 C16 | C17 1.8(6)      | N5 C47 C48 C55  | 177.1(5)  |       |
| N3 C15 C16 | C23<br>177.9(5) | N5 C50 C51 C52  | 53.1(7)   |       |
| N3 C18 C19 | C20 162.3(6)    | N5 C50 C51 C53  | 172.9(5)  |       |
| N3 C18 C19 | C29<br>23.4(10) | N5 C50 C51 C54  | -68.4(7)  |       |
| C1 C2 C3   | N2 0.2(7)       | N6 C47 C48 C49  | 176.7(5)  |       |
| C1 C2 C3   | C5<br>174.6(5)  | N6 C47 C48 C55  | -5.1(9)   |       |
| C1 C9 C10  | C11<br>179.2(6) | C34 N4 C46 N6   | 174.6(5)  |       |
| C1 C9 C14  | C13 178.7(5)    | C34 N4 C46 C45  | -0.2(6)   |       |
| C2 C1 C4   | N1 176.0(5)     | C34 N4 B2 F3    | 77.5(7)   |       |
| C2 C1 C4   | N2 -1.0(6)      | C34 N4 B2 F4    | -42.7(7)  |       |
| C2 C1 C9   | C10 2.7(9)      | C34 N4 B2 N5    | -164.3(5) |       |
| C2 C1 C9   | C14<br>176.4(6) | C34 C35 C36 C37 | 32.6(7)   |       |
| C2 C3 C5   | C6 -11.5(8)     | C34 C35 C45 C46 | -5.0(6)   |       |
| C2 C3 C5   | C7<br>130.6(6)  | C34 C35 C45 C61 | 174.3(5)  |       |
| C2 C3 C5   | C8 105.5(6)     | C34 C39 C40 C41 | -173.4(5) |       |
| C3 N2 C4   | N1<br>175.9(5)  | C35 C34 C39 C38 | -21.7(8)  |       |
| C3 N2 C4   | C1 1.2(6)       | C35 C34 C39 C40 | 151.0(6)  |       |
| C3 N2 B1   | F1 -66.0(7)     | C35 C36 C37 C38 | -56.1(7)  |       |
| C3 N2 B1   | F2 56.2(7)      | C35 C45 C46 N4  | 3.4(6)    |       |
| C3 N2 B1   | N3 174.2(5)     | C35 C45 C46 N6  | -171.3(5) |       |
| C4 N1 C15  | N3 -5.7(8)      | C35 C45 C61 C62 | -154.5(6) |       |
| C4 N1 C15  | C16 170.9(5)    | C35 C45 C61 C66 | 24.6(9)   |       |
| C4 N2 C3   | C2 -0.8(6)      | C36 C35 C45 C46 | 179.0(6)  |       |
| C4 N2 C3   | C5 174.0(5)     | C36 C35 C45 C61 | -1.6(10)  |       |
| C4 N2 B1   | F1 99.8(5)      | C36 C37 C38 C39 | 44.3(8)   |       |
| C4 N2 B1   | F2<br>137.9(5)  | C36 C37 C38 C43 | -134.3(6) |       |
| C4 N2 B1   | N3 -19.9(7)     | C37 C38 C39 C34 | -4.9(8)   |       |
| C4 C1 C2   | C3 0.5(6)       | C37 C38 C39 C40 | -178.1(6) |       |
| C4 C1 C9   | C10<br>179.9(6) | C37 C38 C43 C42 | 178.7(6)  |       |
| C4 C1 C9   | C14 1.0(9)      | C38 C39 C40 C41 | -0.9(9)   |       |
| C9 C1 C2   | C3 178.5(5)     | C39 C34 C35 C36 | 6.3(8)    |       |
| C9 C1 C4   | N1 -1.9(10)     | C39 C34 C35 C45 | -170.3(5) |       |
| C9 C1 C4   | N2<br>178.9(5)  | C39 C38 C43 C42 | 0.1(10)   |       |
| C9 C10 C11 | C12 0.4(11)     | C39 C40 C41 C42 | 0.4(9)    |       |
| C10 C9 C14 | C13 -0.4(9)     | C40 C41 C42 O2  | 179.5(6)  |       |

**Table 2 Fractional Atomic Coordinates ( $\times 10^4$ ) and Equivalent Isotropic Displacement Parameters ( $\text{\AA}^2 \times 10^3$ ) for syn.  $U_{\text{eq}}$  is defined as 1/3 of the trace of the orthogonalised  $U_{ij}$  tensor.**

| Atom        | x            | y               | z         | U(eq) |
|-------------|--------------|-----------------|-----------|-------|
| C10 C11 C12 | C13 -0.2(11) | C40 C41 C42 C43 | 0.3(10)   |       |
| C11 C12 C13 | C14 -0.2(10) | C41 C42 C43 C38 | -0.6(10)  |       |
| C12 C13 C14 | C9 0.5(9)    | C43 C38 C39 C34 | 173.8(6)  |       |
| C14 C9 C10  | C11 -0.1(10) | C43 C38 C39 C40 | 0.6(9)    |       |
| C15 N1 C4   | N2 -0.7(8)   | C44 O2 C42 C41  | -2.6(10)  |       |
| C15 N1 C4   | C1 177.2(5)  | C44 O2 C42 C43  | 176.7(7)  |       |
| C15 N3 C18  | C17 -2.3(6)  | C45 C35 C36 C37 | -151.9(6) |       |
| C15 N3 C18  | C19 174.4(6) | C45 C61 C62 C63 | 177.9(6)  |       |
| C15 N3 B1   | F1 105.0(5)  | C45 C61 C66 C65 | -177.5(6) |       |
| C15 N3 B1   | F2 135.2(5)  | C46 N4 C34 C35  | -3.0(6)   |       |
| C15 N3 B1   | N2 14.5(7)   | C46 N4 C34 C39  | 172.0(5)  |       |
| C15 C16 C17 | C18 -3.2(6)  | C46 N4 B2 F3    | -105.1(5) |       |
| C15 C16 C17 | C22 176.3(6) | C46 N4 B2 F4    | 134.6(5)  |       |
| C15 C16 C23 | C24 149.7(6) | C46 N4 B2 N5    | 13.1(7)   |       |
| C15 C16 C23 | C28 -30.6(8) | C46 N6 C47 N5   | -2.0(8)   |       |
| C16 C17 C18 | N3 3.5(6)    | C46 N6 C47 C48  | -179.5(5) |       |
| C16 C17 C18 | C19 173.5(5) | C46 C45 C61 C62 | 24.8(8)   |       |
| C16 C17 C22 | C21 147.9(6) | C46 C45 C61 C66 | -156.1(6) |       |
| C16 C23 C24 | C25 179.4(6) | C47 N5 C50 C49  | -0.1(6)   |       |
| C16 C23 C28 | C27 179.4(6) | C47 N5 C50 C51  | 173.5(5)  |       |
| C17 C16 C23 | C24 -30.0(9) | C47 N5 B2 F3    | 99.6(5)   |       |
| C17 C16 C23 | C28 149.7(6) | C47 N5 B2 F4    | -137.4(5) |       |
| C17 C18 C19 | C20 -21.3(8) | C47 N5 B2 N4    | -17.9(6)  |       |
| C17 C18 C19 | C29 153.0(6) | C47 N6 C46 N4   | -3.8(8)   |       |
| C18 N3 C15  | N1 177.5(5)  | C47 N6 C46 C45  | 170.2(5)  |       |
| C18 N3 C15  | C16 0.3(6)   | C47 C48 C49 C50 | 1.0(6)    |       |
| C18 N3 B1   | F1 74.8(7)   | C47 C48 C55 C56 | -162.3(6) |       |
| C18 N3 B1   | F2 -45.1(7)  | C47 C48 C55 C60 | 17.5(9)   |       |
| C18 N3 B1   | N2 165.7(5)  | C48 C49 C50 N5  | -0.6(6)   |       |
| C18 C17 C22 | C21 31.6(8)  | C48 C49 C50 C51 | -174.3(5) |       |
| C18 C19 C20 | C21 -5.6(9)  | C48 C55 C56 C57 | 179.7(6)  |       |
| C18 C19 C20 | C33 175.3(6) | C48 C55 C60 C59 | -178.3(6) |       |
| C18 C19 C29 | C30 174.0(6) | C49 C48 C55 C56 | 15.5(9)   |       |
| C19 C20 C21 | C22 44.3(8)  | C49 C48 C55 C60 | -164.7(6) |       |
| C19 C20 C33 | C31 -1.4(11) | C49 C50 C51 C52 | -134.2(6) |       |
| C19 C29 C30 | C31 -0.1(10) | C49 C50 C51 C53 | -14.5(8)  |       |
| C20 C19 C29 | C30 0.3(9)   | C49 C50 C51 C54 | 104.2(6)  |       |

**Table 2 Fractional Atomic Coordinates ( $\times 10^4$ ) and Equivalent Isotropic Displacement Parameters ( $\text{\AA}^2 \times 10^3$ ) for syn.  $U_{\text{eq}}$  is defined as 1/3 of the trace of the orthogonalised  $U_{ij}$  tensor.**

| Atom        | x               | y               | z         | U(eq) |
|-------------|-----------------|-----------------|-----------|-------|
| C20 C21 C22 | C17 -54.8(7)    | C50 N5 C47 N6   | -177.1(5) |       |
| C21 C20 C33 | C31 179.5(7)    | C50 N5 C47 C48  | 0.8(6)    |       |
| C22 C17 C18 | N3<br>176.0(5)  | C50 N5 B2 F3    | -65.7(7)  |       |
| C22 C17 C18 | C19 6.9(8)      | C50 N5 B2 F4    | 57.3(7)   |       |
| C23 C16 C17 | C18 176.6(5)    | C50 N5 B2 N4    | 176.8(5)  |       |
| C23 C16 C17 | C22 -3.9(10)    | C55 C48 C49 C50 | -177.2(5) |       |
| C23 C24 C25 | C26 1.3(10)     | C55 C56 C57 C58 | -1.3(10)  |       |
| C24 C23 C28 | C27 0.4(9)      | C56 C55 C60 C59 | 1.6(10)   |       |
| C24 C25 C26 | C27 -2.4(11)    | C56 C57 C58 C59 | 1.3(11)   |       |
| C25 C26 C27 | C28 2.4(11)     | C57 C58 C59 C60 | 0.2(11)   |       |
| C26 C27 C28 | C23 -1.4(10)    | C58 C59 C60 C55 | -1.7(12)  |       |
| C28 C23 C24 | C25 -0.3(9)     | C60 C55 C56 C57 | -0.1(9)   |       |
| C29 C19 C20 | C21 179.6(6)    | C61 C45 C46 N4  | -176.0(5) |       |
| C29 C19 C20 | C33 0.5(10)     | C61 C45 C46 N6  | 9.3(9)    |       |
| C29 C30 C31 | O1<br>179.6(7)  | C61 C62 C63 C64 | 0.4(9)    |       |
| C29 C30 C31 | C33 -0.8(10)    | C62 C61 C66 C65 | 1.6(9)    |       |
| C30 C31 C33 | C20 1.6(12)     | C62 C63 C64 C65 | 0.0(10)   |       |
| C32 O1 C31  | C30 -7.9(11)    | C63 C64 C65 C66 | 0.3(10)   |       |
| C32 O1 C31  | C33 173.3(7)    | C64 C65 C66 C61 | -1.2(11)  |       |
| C33 C20 C21 | C22<br>136.5(7) | C66 C61 C62 C63 | -1.2(9)   |       |
| B1 N2 C3    | C2 166.4(5)     | B2 N4 C34 C35   | 174.6(5)  |       |
| B1 N2 C3    | C5 -18.7(9)     | B2 N4 C34 C39   | -10.3(9)  |       |
| B1 N2 C4    | N1 15.2(8)      | B2 N4 C46 N6    | -3.2(8)   |       |
| B1 N2 C4    | C1<br>167.7(5)  | B2 N4 C46 C45   | -178.1(4) |       |
| B1 N3 C15   | N1 -2.7(8)      | B2 N5 C47 N6    | 14.3(8)   |       |
| B1 N3 C15   | C16<br>179.8(5) | B2 N5 C47 C48   | -167.8(4) |       |
| B1 N3 C18   | C17 177.9(5)    | B2 N5 C50 C49   | 166.7(5)  |       |
| B1 N3 C18   | C19 -5.4(10)    | B2 N5 C50 C51   | -19.7(9)  |       |

**Table 7 Hydrogen Atom Coordinates ( $\text{\AA} \times 10^4$ ) and Isotropic Displacement Parameters ( $\text{\AA}^2 \times 10^3$ ) for syn.**

| Atom | x       | y       | z       | U(eq) |
|------|---------|---------|---------|-------|
| H2   | 3206.31 | 6661.14 | 5981.64 | 34    |
| H6A  | 2447.2  | 8012.98 | 6750.57 | 61    |
| H6B  | 2716.8  | 8978.93 | 6499.76 | 61    |
| H6C  | 3538.89 | 8093.1  | 6131.13 | 61    |
| H7A  | -318.62 | 9040.77 | 5640.92 | 56    |
| H7B  | 437.39  | 9525.95 | 6220.34 | 56    |
| H7C  | 46.6    | 8585.27 | 6440.17 | 56    |

**Table 2 Fractional Atomic Coordinates ( $\times 10^4$ ) and Equivalent Isotropic Displacement Parameters ( $\text{\AA}^2 \times 10^3$ ) for syn.  $U_{\text{eq}}$  is defined as 1/3 of of the trace of the orthogonalised  $U_{ij}$  tensor.**

| Atom | x        | y        | z        | $U(\text{eq})$ |
|------|----------|----------|----------|----------------|
| H8A  | 2948.23  | 8667.91  | 4836.42  | 61             |
| H8B  | 2196.4   | 9582.34  | 5194.57  | 61             |
| H8C  | 1470.38  | 9053.53  | 4632.25  | 61             |
| H10  | 4289.29  | 5270.82  | 6093.85  | 49             |
| H11  | 5545.99  | 3820.73  | 6189.88  | 55             |
| H12  | 5074.46  | 2650.75  | 5472.95  | 45             |
| H13  | 3312.53  | 2941.76  | 4658.02  | 42             |
| H14  | 2018.41  | 4392.45  | 4564.43  | 38             |
| H21A | -2279.98 | 7846.98  | 1855.26  | 50             |
| H21B | -3750.07 | 7814.65  | 1664.66  | 50             |
| H22A | -3751.33 | 6596.57  | 2531.49  | 44             |
| H22B | -2530.63 | 6322.41  | 1974.17  | 44             |
| H24  | -2603.28 | 4956.82  | 2654.32  | 46             |
| H25  | -2167.16 | 3499.6   | 2186.05  | 56             |
| H26  | -73.21   | 2590.39  | 2306.25  | 56             |
| H27  | 1595.55  | 3196.69  | 2809.96  | 54             |
| H28  | 1169.11  | 4669.72  | 3287.2   | 46             |
| H29  | -3029.18 | 8785.01  | 4458.04  | 37             |
| H30  | -4724.03 | 10018.1  | 4258.16  | 41             |
| H32A | -7345.71 | 11476.11 | 3374.37  | 82             |
| H32B | -5978.59 | 11341.99 | 3776.15  | 82             |
| H32C | -6947.16 | 10672.89 | 3967.9   | 82             |
| H33  | -4969.65 | 9236.17  | 2108.8   | 55             |
| H36A | 8737.62  | 3540.71  | 7480.55  | 41             |
| H36B | 7565.93  | 3815.91  | 6911.6   | 41             |
| H37A | 7379.04  | 2284.53  | 6806.99  | 46             |
| H37B | 8847.36  | 2359.93  | 6611.03  | 46             |
| H40  | 8029.98  | 1288.17  | 9417.41  | 36             |
| H41  | 9804.7   | 100.33   | 9232.53  | 40             |
| H43  | 10147.75 | 954.68   | 7073.67  | 47             |
| H44A | 12511.79 | -1298.46 | 8341.85  | 87             |
| H44B | 11103.89 | -1220.39 | 8720.06  | 87             |
| H44C | 12019.66 | -548.86  | 8950.19  | 87             |
| H49  | 1596.16  | 3196.5   | 10941.02 | 34             |
| H52A | 5160.75  | 845.43   | 10537.01 | 58             |
| H52B | 4415.95  | 339.58   | 11147.55 | 58             |
| H52C | 4831.17  | 1264.98  | 11344.26 | 58             |
| H53A | 2395.38  | 1841.87  | 11713.84 | 64             |
| H53B | 2204.91  | 859.95   | 11498.72 | 64             |
| H53C | 1319.85  | 1727.71  | 11127.38 | 64             |
| H54A | 1926.26  | 1272.99  | 9811.51  | 60             |
| H54B | 2695.94  | 340.03   | 10145.29 | 60             |
| H54C | 3412.18  | 921.92   | 9579.93  | 60             |
| H56  | 892.98   | 4679.2   | 11268.1  | 46             |



**Table 2 Fractional Atomic Coordinates ( $\times 10^4$ ) and Equivalent Isotropic Displacement Parameters ( $\text{\AA}^2 \times 10^3$ ) for *syn*.  $U_{\text{eq}}$  is defined as 1/3 of the trace of the orthogonalised  $U_{ij}$  tensor.**

| Atom | x       | y       | z        | U(eq) |
|------|---------|---------|----------|-------|
| H57  | -281.79 | 6157.18 | 11418.68 | 57    |
| H58  | 13.52   | 7304.34 | 10571.69 | 55    |
| H59  | 1420.61 | 6958.7  | 9556.1   | 63    |
| H60  | 2536.99 | 5483.33 | 9359.5   | 52    |
| H62  | 4906.09 | 5610.82 | 9045.03  | 41    |
| H63  | 4434.8  | 7148.86 | 8706.42  | 46    |
| H64  | 4897.67 | 7609.35 | 7464.02  | 44    |
| H65  | 5805.19 | 6554.46 | 6609.32  | 51    |
| H66  | 6259.76 | 5029.69 | 6924.21  | 43    |

### Experimental

Single crystals of  $\text{C}_{33}\text{H}_{30}\text{BF}_2\text{N}_3\text{O}$  [*syn*] were [ ]. A suitable crystal was selected and [ ] on a **SuperNova, Dual, Cu at zero, AtlasS2** diffractometer. The crystal was kept at 179.99(10) K during data collection.

## 6. References

- [1] Y. Su, N. Xu, C. Wang, Q. Qiao, R. Li, D. Zhang, X. Liu, Z. Xu, X.-D. Jiang, *J. Am. Chem. Soc.* 2022, Submitted.
- [2] J. Li, J. Wang, D. Zhang, T. Cui, Z. Xu and X.-D. Jiang, *Dyes Pigm.*, 2022, **199**, 110092.
- [3] C. Murali Krishna, Yves Lion and Peter Riesz, *Photochem. Photobiol.*, 2010, **45**, 1-6.
- [4] J. R. Kanofsky. Measurement of singlet-oxygen in vivo: progress and pitfalls. *Photochem. Photobiol.*, 2011, **87**, 14-17.
- [5] B. R. Rabello, A. P. Gerola, D. S. Pellosi, A. L. Tessaro, J. L. Aparício, W. Caetano and N. Hioka, *J. Photochem. Photobiol. A Chem.*, 2012, **238**, 53-62.
- [6] J. Zhu, J. Zou, Z. Zhang, J. Zhang, Y. Sun, X. Dong and Q. Zhang, *Mater. Chem. Front.*, 2019, **3**, 1523-1531.
- [7] D. Xi, M. Xiao, J. Cao, L. Zhao, N. Xu, S. Long, J. Fan, K. Shao, W. Sun, X. Yan, and X. Peng, *Adv. Mater.*, 2020, **32**, 1907855.
- [8] H. S. Jung, P. Verwilt, A. Sharma, J. L. Sessler and J. S. Kim, *Chem. Soc. Rev.*, 2018, **47**, 2280-2297.
- [9] B.-D. Zheng, Q.-X. He, X. Li, J. Yoon and J.-D. Huang, *Coord. Chem. Rev.*, 2021, **426**, 213548.
- [10] Q. Chen, X. Liu, J. Zeng, Z. Cheng and Z. Liu, *Biomaterials*, 2016, **98**, 23-30.
